# Supplementary material
Source: PubMed Central journal article supplement (PMC9951377)
Supplement: bmjmed-2022-000297supp001.pdf [file bmjmed-2022-000297supp001.pdf]

**Supplemental Table 1: Study Participant characteristics for variables with missing data (n = 19,622). Data can be missing because a participant was not asked a demographic question or because they were asked and did not supply an answer; categories in bold. Data are n (%).**

| Characteristic                   | Unvaccinated<br>(n =4,686) | Vaccinated<br>(n =14,936) | Overall<br>(n =19,622) |
|----------------------------------|----------------------------|---------------------------|------------------------|
| <b>Race/Ethnicity</b>            |                            |                           |                        |
| Asian                            | 20 (0.43)                  | 130 (0.87)                | 150 (0.76)             |
| Black                            | 170 (3.63)                 | 346 (2.32)                | 516 (2.63)             |
| Hispanic                         | 76 (1.62)                  | 235 (1.57)                | 311 (1.58)             |
| Middle-Eastern/North African     | 15 (0.32)                  | 41 (0.27)                 | 56 (0.29)              |
| Native Hawaiian/Pacific Islander | 4 (0.09)                   | 19 (0.13)                 | 23 (0.12)              |
| White                            | 1,513 (32.29)              | 5,306 (35.52)             | 6,819 (34.75)          |
| <b>Not asked question</b>        | <b>1,759 (37.54)</b>       | <b>6,283 (42.07)</b>      | <b>8,042 (40.98)</b>   |
| <b>No response</b>               | <b>1,129 (24.09)</b>       | <b>2,576 (17.25)</b>      | <b>3,705 (18.88)</b>   |
| <b>Parity</b>                    |                            |                           |                        |
| Nulliparous                      | 3,192 (68.12)              | 11,509 (77.06)            | 14,701 (74.92)         |
| Parous                           | 757 (16.15)                | 1,885 (12.62)             | 2,642 (13.46)          |
| <b>Not asked question</b>        | <b>136 (2.90)</b>          | <b>76 (0.51)</b>          | <b>212 (1.08)</b>      |
| <b>No response</b>               | <b>601 (12.83)</b>         | <b>1,466 (9.82)</b>       | <b>2,067 (10.53)</b>   |
| <b>BMI</b>                       |                            |                           |                        |
| Underweight                      | 144 (3.07)                 | 428 (2.87)                | 572 (2.92)             |
| Normal weight                    | 2,057 (43.90)              | 7,274 (48.70)             | 9,331 (47.55)          |
| Overweight                       | 564 (12.04)                | 1,924 (12.88)             | 2,488 (12.68)          |
| Obese                            | 233 (4.97)                 | 852 (5.70)                | 1,085 (5.53)           |
| <b>No response</b>               | <b>1,688 (36.02)</b>       | <b>4,458 (29.85)</b>      | <b>6,146 (31.32)</b>   |
| <b>Education level</b>           |                            |                           |                        |
| Less than 4-year college         | 1,215 (25.93)              | 2,205 (14.76)             | 3,420 (17.43)          |
| College degree or more           | 2,496 (53.27)              | 10,540 (70.57)            | 13,036 (66.44)         |
| <b>Not asked question</b>        | <b>51 (1.09)</b>           | <b>31 (0.21)</b>          | <b>82 (0.42)</b>       |
| <b>No response</b>               | <b>924 (19.72)</b>         | <b>2,160 (14.46)</b>      | <b>3,084 (15.72)</b>   |

---

|                           |                    |                     |                     |
|---------------------------|--------------------|---------------------|---------------------|
| Relationship status       |                    |                     |                     |
| Not in relationship       | 631 (13.47)        | 1,928 (12.91)       | 2,559 (13.04)       |
| In relationship           | 3,002 (64.06)      | 10,553 (70.65)      | 13,555 (69.08)      |
| <b>Not asked question</b> | <b>523 (11.16)</b> | <b>1,063 (7.12)</b> | <b>1,586 (8.08)</b> |
| <b>No response</b>        | <b>530 (11.31)</b> | <b>1,392 (9.32)</b> | <b>1,922 (9.80)</b> |

---

**Supplemental Table 2: Detailed country list, by study region (n = 19,622).**

| Australia/<br>New<br>Zealand | Europe                    |                        | Other                 |                            | UK/Channel<br>Islands | United<br>States/<br>Canada |
|------------------------------|---------------------------|------------------------|-----------------------|----------------------------|-----------------------|-----------------------------|
| n = 767                      | n = 6,584                 |                        | n = 439               |                            | n = 6,222             | n = 5,610                   |
| Australia<br>(698; 91%)      | Aland<br>Island           | Italy                  | Argentina             | Malawi                     | Guernsey              | Canada<br>(1,037;<br>18%)   |
| New<br>Zealand<br>(69; 9%)   | Andorra                   | Latvia                 | Bermuda               | Malaysia                   | Isle of Man           |                             |
|                              | Austria                   | Lithuania              | Brazil (273;<br>62%)  | Martinique                 | Jersey                | US (4,573;<br>82%)          |
|                              | Belgium                   | Luxembourg             | Cambodia              | Mauritius                  | United<br>Kingdom     |                             |
|                              | Bosnia<br>Herzegovin<br>a | Macedonia              | Chile                 | Mexico                     |                       |                             |
|                              | Bulgaria                  | Malta                  | Colombia              | Namibia                    |                       |                             |
|                              | Croatia                   | Monaco                 | Costa Rica            | Panama                     |                       |                             |
|                              | Cyprus                    | Netherlands            | Dominican<br>Republic | Peru                       |                       |                             |
|                              | Czech<br>Republic         | Norway                 | Ecuador               | Philippines                |                       |                             |
|                              | Denmark                   | Poland                 | El Salvador           | Saint Lucia                |                       |                             |
|                              | Estonia                   | Portugal               | Ethiopia              | Saudi<br>Arabia            |                       |                             |
|                              | Faroe<br>Islands          | Romania                | French<br>Polynesia   | Seychelles                 |                       |                             |
|                              | Finland                   | Russia                 | Guatemala             | Singapore                  |                       |                             |
|                              | France                    | Slovakia               | Hong Kong             | South<br>Africa            |                       |                             |
|                              | Germany                   | Slovenia               | India                 | Sri Lanka                  |                       |                             |
|                              | Greece                    | Spain                  | Indonesia             | Taiwan                     |                       |                             |
|                              | Hungary                   | Sweden<br>(3,664; 56%) | Israel                | Thailand                   |                       |                             |
|                              | Iceland                   | Switzerland            | Japan                 | Turkey                     |                       |                             |
|                              | Ireland                   | Ukraine                | Jordan                | United<br>Arab<br>Emirates |                       |                             |
|                              |                           |                        | Korea                 | US Minor<br>Islands        |                       |                             |
|                              |                           |                        | Kuwait                | Virgin<br>Islands          |                       |                             |
|                              |                           |                        | Liberia               |                            |                       |                             |

If shown, individual country data are (n; %); if no data are shown, data are suppressed due to small sample sizes

**Supplemental Table 3: Characteristics of study participants, by vaccination status and experience of a clinically significant change in menstrual cycle length ( $\geq$  eight days) during first COVID-19 vaccine dose cycle (n = 19,622). Data are n (%) or mean  $\pm$  standard deviation.**

| Characteristic             | Unvaccinated (n =4,686) |                     |         | Vaccinated (n =14,936) |                     |         |
|----------------------------|-------------------------|---------------------|---------|------------------------|---------------------|---------|
|                            | < 8-day change          | $\geq$ 8-day change | p-value | < 8-day change         | $\geq$ 8-day change | p-value |
| n                          | 4,450                   | 236                 |         | 14,007                 | 929                 |         |
| Age (y)                    |                         |                     | 0.048   |                        |                     | 0.009   |
| 18-24                      | 855 (19.21)             | 52 (22.03)          |         | 1,341 (9.57)           | 120 (12.92)         |         |
| 25-29                      | 1,521 (34.18)           | 103 (43.64)         |         | 4,839 (34.55)          | 340 (36.60)         |         |
| 30-34                      | 1,263 (28.38)           | 48 (20.34)          |         | 4,929 (35.19)          | 302 (32.51)         |         |
| 35-39                      | 591 (13.28)             | 24 (10.17)          |         | 2,133 (15.23)          | 114 (12.27)         |         |
| 40-45                      | 220 (4.94)              | 9 (3.81)            |         | 765 (5.46)             | 53 (5.71)           |         |
| Cycle 1 length (d)         | 29.1 $\pm$ 4.1          | 32.2 $\pm$ 8.0      | < 0.001 | 28.8 $\pm$ 3.7         | 31.0 $\pm$ 6.4      | < 0.001 |
| Cycle 2 length (d)         | 29.0 $\pm$ 3.9          | 31.2 $\pm$ 6.7      | < 0.001 | 28.7 $\pm$ 3.6         | 31.2 $\pm$ 6.1      | < 0.001 |
| Cycle 3 length (d)         | 28.8 $\pm$ 3.6          | 31.0 $\pm$ 7.2      | < 0.001 | 28.7 $\pm$ 3.7         | 31.5 $\pm$ 6.7      | < 0.001 |
| Pre-vax average length (d) | 28.9 $\pm$ 2.9          | 31.5 $\pm$ 3.9      | < 0.001 | 28.7 $\pm$ 2.8         | 31.2 $\pm$ 3.7      | < 0.001 |

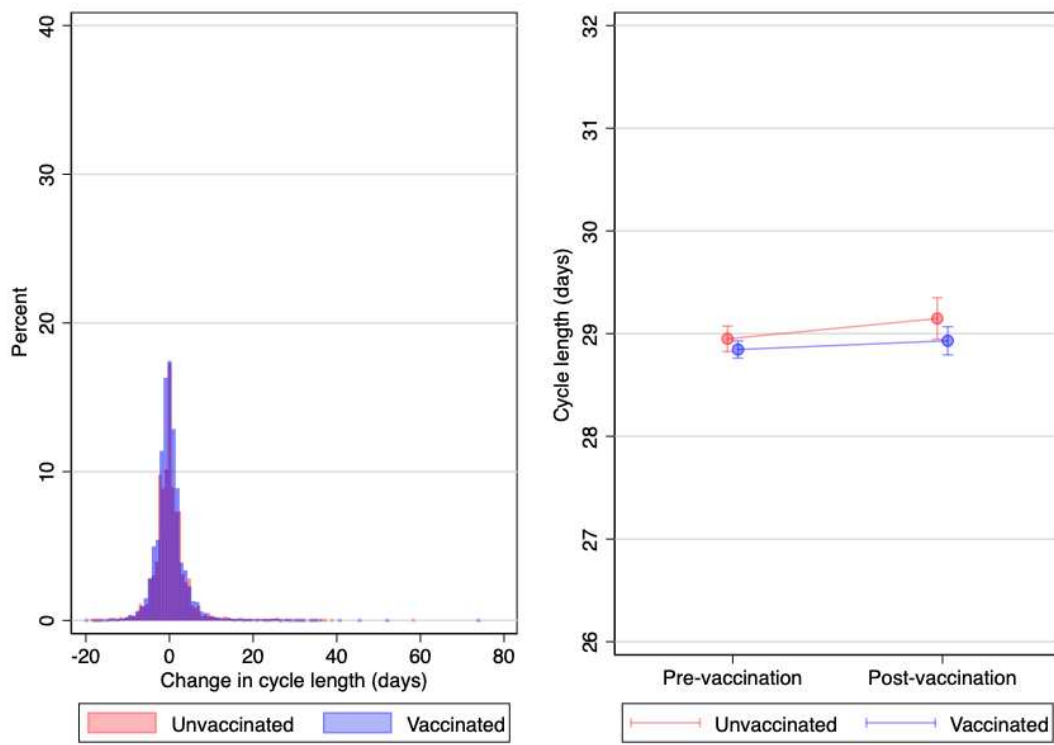

**Supplemental Figure 1: Left) Overlaid histogram of the change in cycle length (days) between the 3-pre vaccination cycle average and the ‘post-vaccine’ cycle following the second dose vaccination cycle. Histograms for unvaccinated individuals are shown in red, vaccinated individuals are shown in blue, overlapping distributions appear as purple. Right) Adjusted marginal means for cycle length (days) for the 3 pre-vaccination cycle average and the ‘post-vaccine’ cycle following the second dose vaccination cycle). Estimates are from a mixed effects model with random intercepts and random slopes at the individual level, an interaction between vaccination status and pre/post-vaccination timing, and adjusted for age, body mass index, educational attainment, parity, relationship status, and global region. Unvaccinated individuals are shown in red, vaccinated individuals are shown in blue, error bars represent 99.3% confidence intervals.**

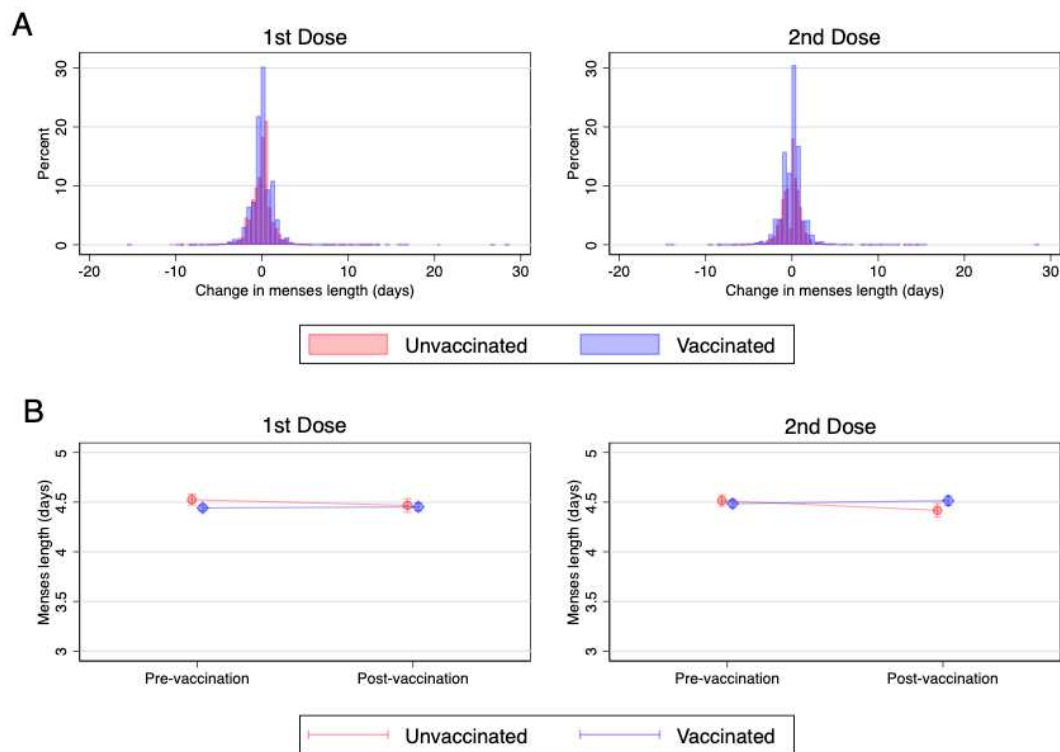

**Supplemental Figure 2: A) Overlaid histograms of the change in menses length (days) between the 3-pre vaccination cycle average and the vaccination cycle for first dose (left) or second dose (right). Histograms for unvaccinated individuals are shown in red, vaccinated individuals are shown in blue, overlapping distributions appear as purple. B) Adjusted marginal means for menses length (days) for the 3 pre-vaccination cycle average and the vaccination cycle for first dose (left) or second dose (right). Estimates are from mixed effects models with random intercepts and random slopes at the individual level, an interaction between vaccination status and pre/post-vaccination timing, and adjusted for age, body mass index, educational attainment, parity, relationship status, and global region. Unvaccinated individuals are shown in red, vaccinated individuals are shown in blue, error bars represent 99.3% confidence intervals.**

**Supplemental Table 4: Sensitivity analysis incorporating 500 iterations of imputation, covariate balancing propensity score (CBPS) weighting, and bootstrapped standard errors. CBPS weights balanced assignment to treatment group, and balanced on age group, race/ethnicity, parity, body mass index, education level, relationship status, and global region.**

| Outcome       | Cycle                   | Unvaccinated |                                     | Vaccinated |                                     | Adjusted difference in change |
|---------------|-------------------------|--------------|-------------------------------------|------------|-------------------------------------|-------------------------------|
|               |                         | n            | Change from pre-vaccination average | n          | Change from pre-vaccination average |                               |
| Cycle length  | First Dose              | 4,686        | 0.06 (-0.12, 0.23)                  | 14,936     | 0.75 (0.53, 0.98)                   | 0.70 (0.18, 1.23)             |
|               | Second Dose             | 4,423        | 0.23 (0.01, 0.44)                   | 9,600      | 0.55 (0.27, 0.83)                   | 0.90 (0.34, 1.47)             |
|               | Cycle after second dose | 4,134        | 0.19 (-0.02, 0.41)                  | 8,871      | -0.10 (-0.35, 0.14)                 | -0.32 (-0.81, 0.17)           |
| Menses length | First Dose              | 4,686        | -0.04 (-0.10, 0.02)                 | 14,936     | 0.02 (-0.05, 0.10)                  | 0.04 (-0.13, 0.21)            |
|               | Second Dose             | 4,423        | -0.09 (-0.15, -0.04)                | 9,600      | 0.10 (0.03, 0.17)                   | 0.16 (0.00, 0.32)             |

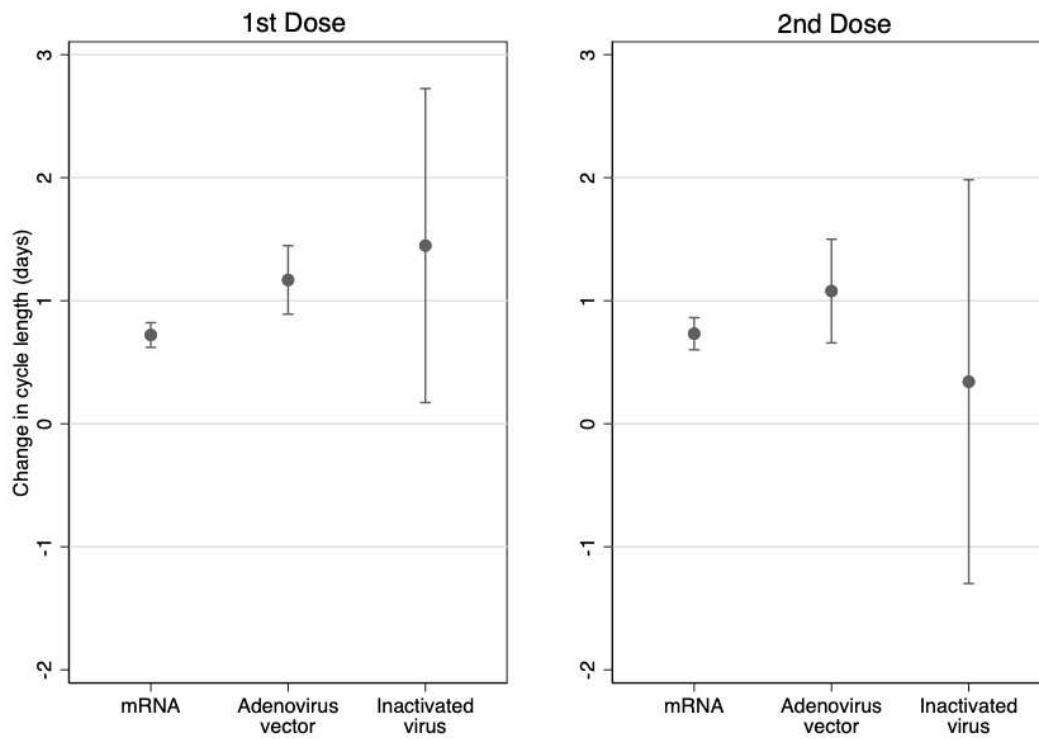

**Supplemental Figure 3: Change in cycle length (days) between the 3-pre vaccination cycle average and the vaccination cycle for first dose (left, n = 14,257) or second dose (right, n = 9,216), among vaccinated individuals with known vaccine brands, adjusted for five-year age groups.**
